# Supplementary material for: Early epidemiological indicators, outcomes, and interventions of COVID-19 pandemic: A systematic review
Source: PubMed Central journal article supplement (PMC7567430; doi:10.7189/jogh.10.020506), 2020-12
Supplement: jogh-10-020506-s001.pdf [file jogh-10-020506-s001.pdf]

## **Early epidemiological indicators, outcomes, and interventions of COVID-19 pandemic: A systematic review**

Figure S1: Flow diagram of literature search and selection process of COVID-19

Figure S2: Country-specific Case Fatality Rate (CFR)

Figure S3: COVID-19 Specific death rate

Figure S3A: COVID-19 Specific death rate (Cumulative-change)

Figure S3B: COVID-19 Specific death rate (Daily-change)

Figure S4: County-specific timeline of doubling time for cases and deaths

**Figure S1: Flow diagram of literature search and selection process of COVID-19**

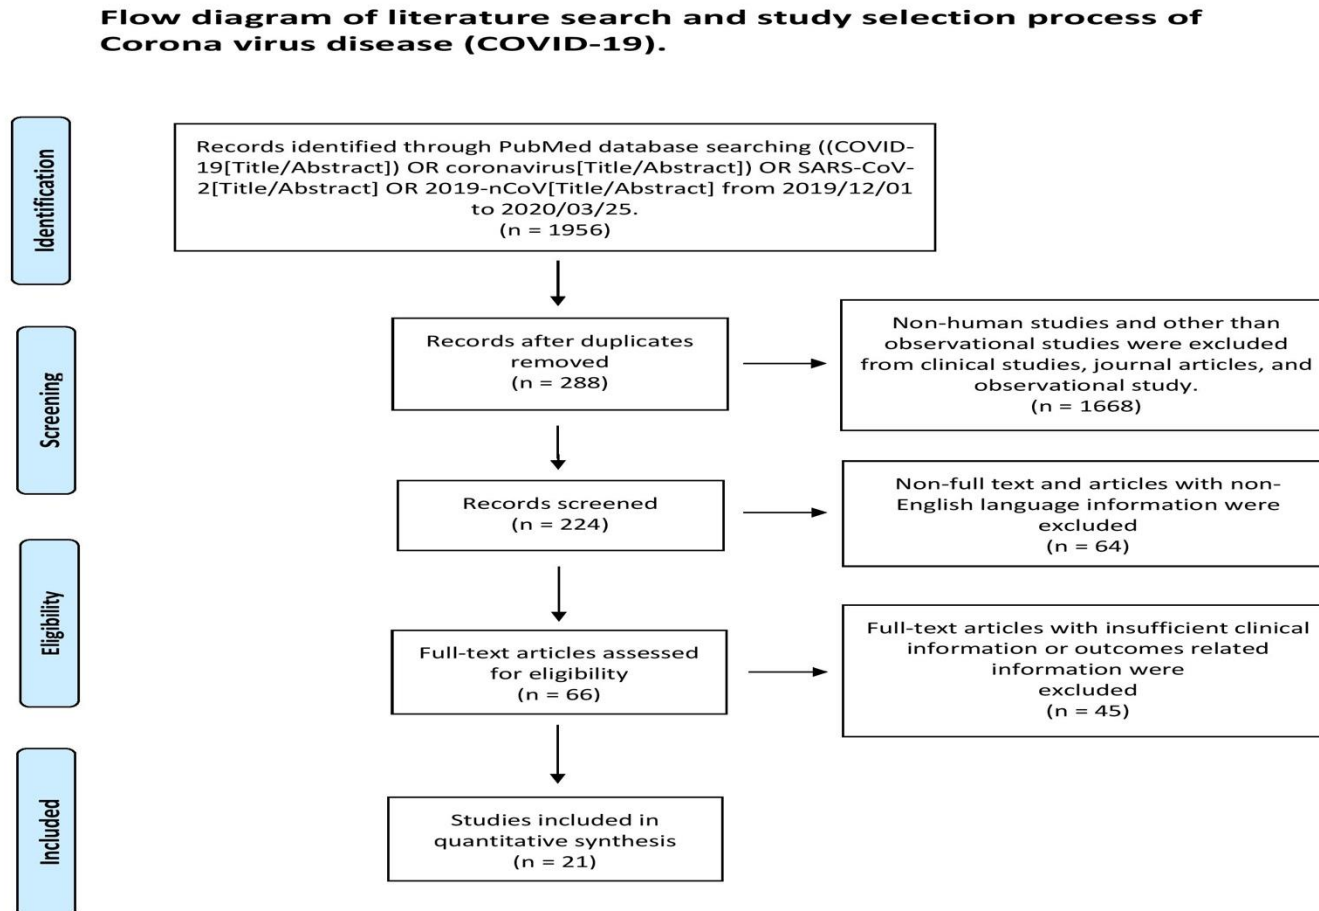







Figure S4: County-specific timeline of doubling time for cases and deaths

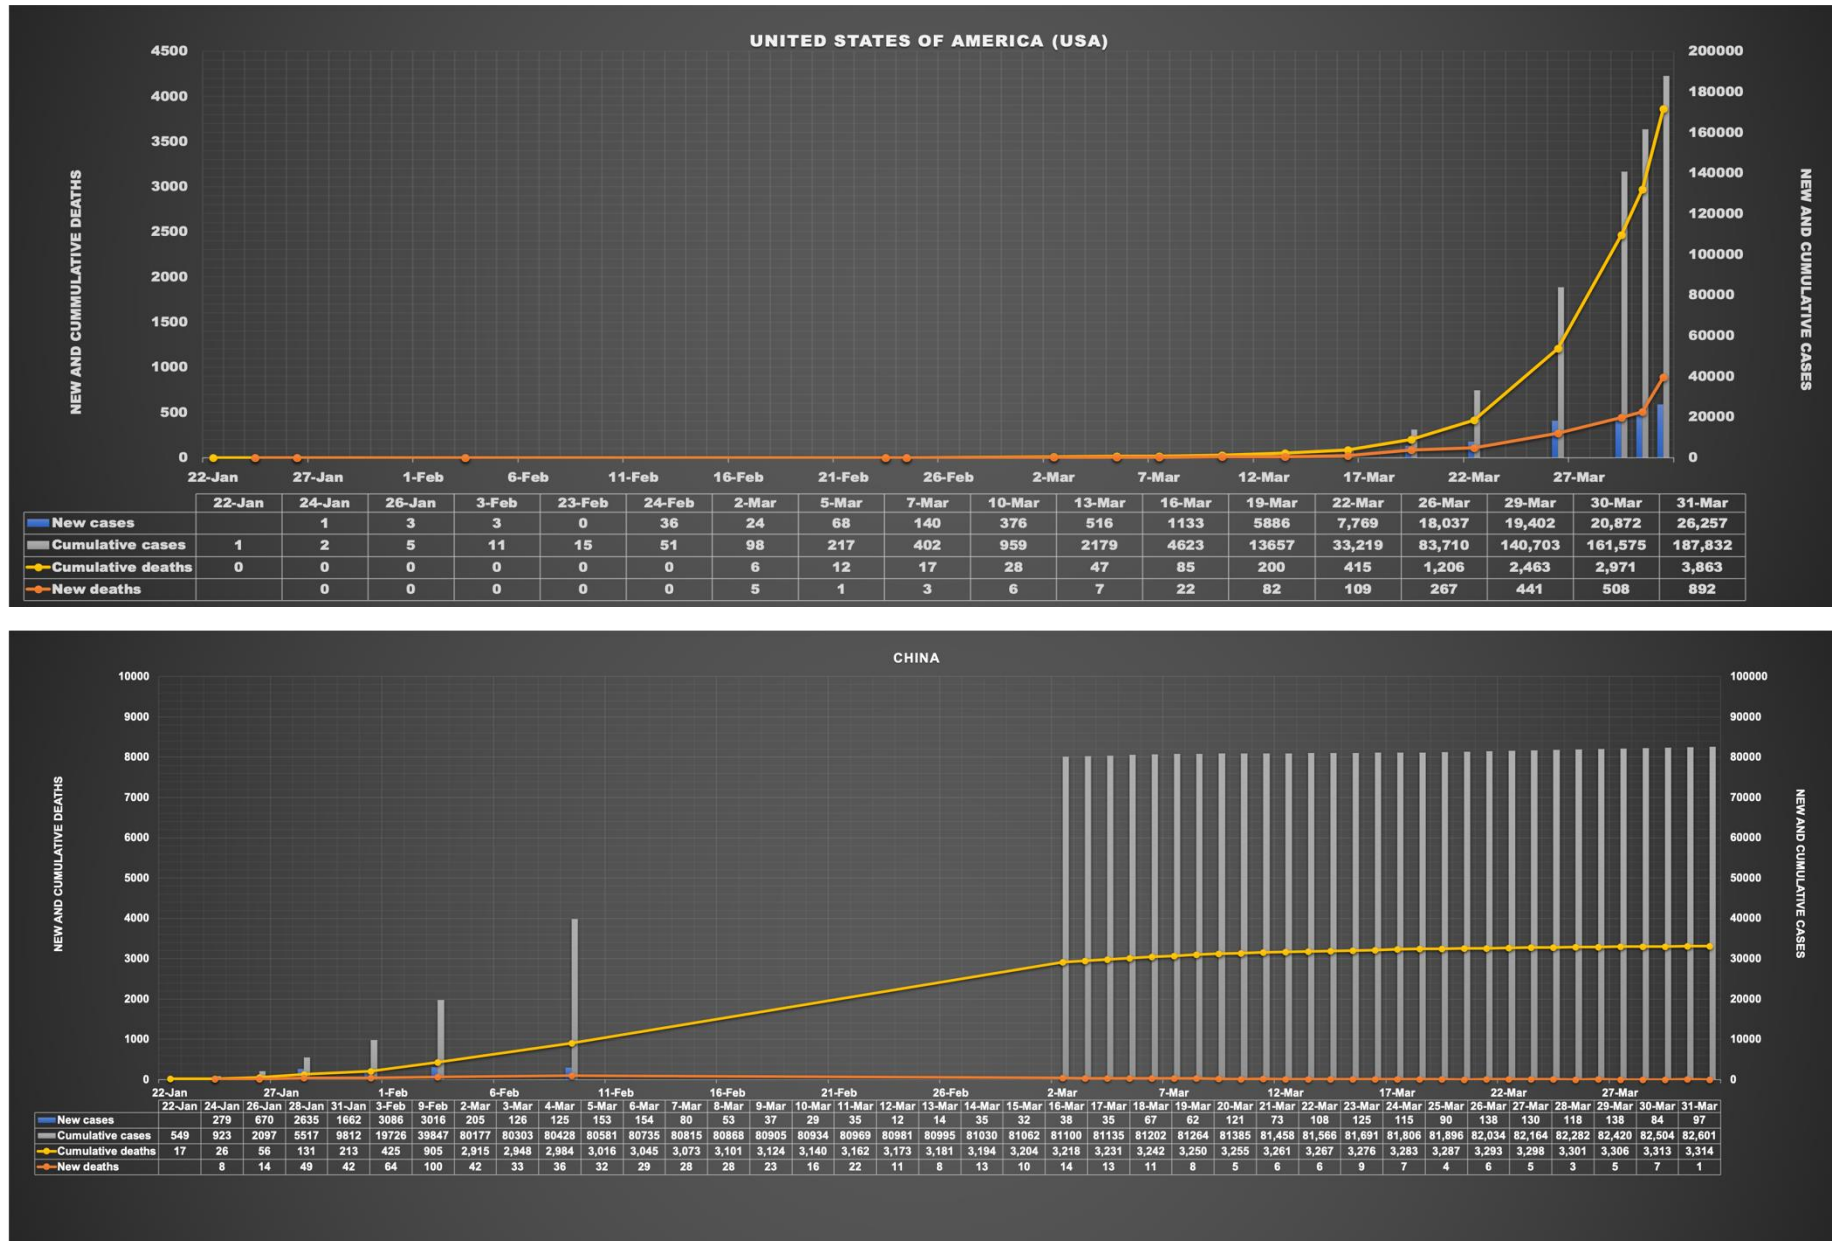

### ITALY

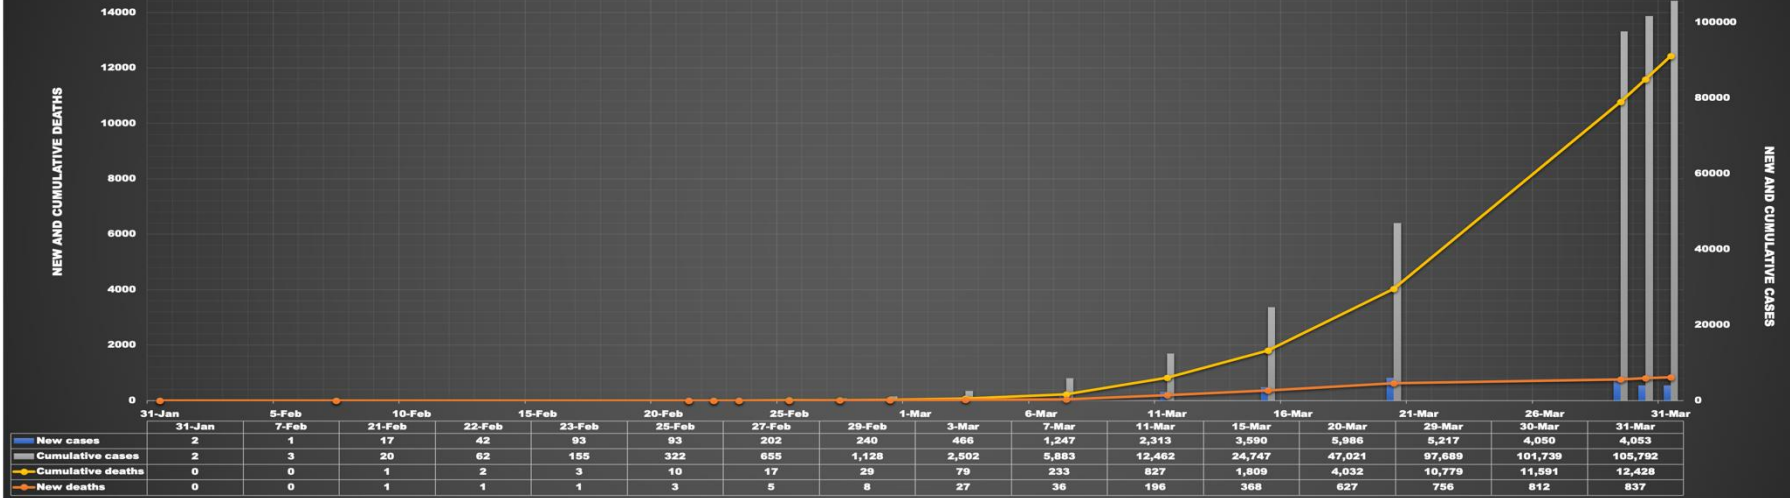

### IRAN

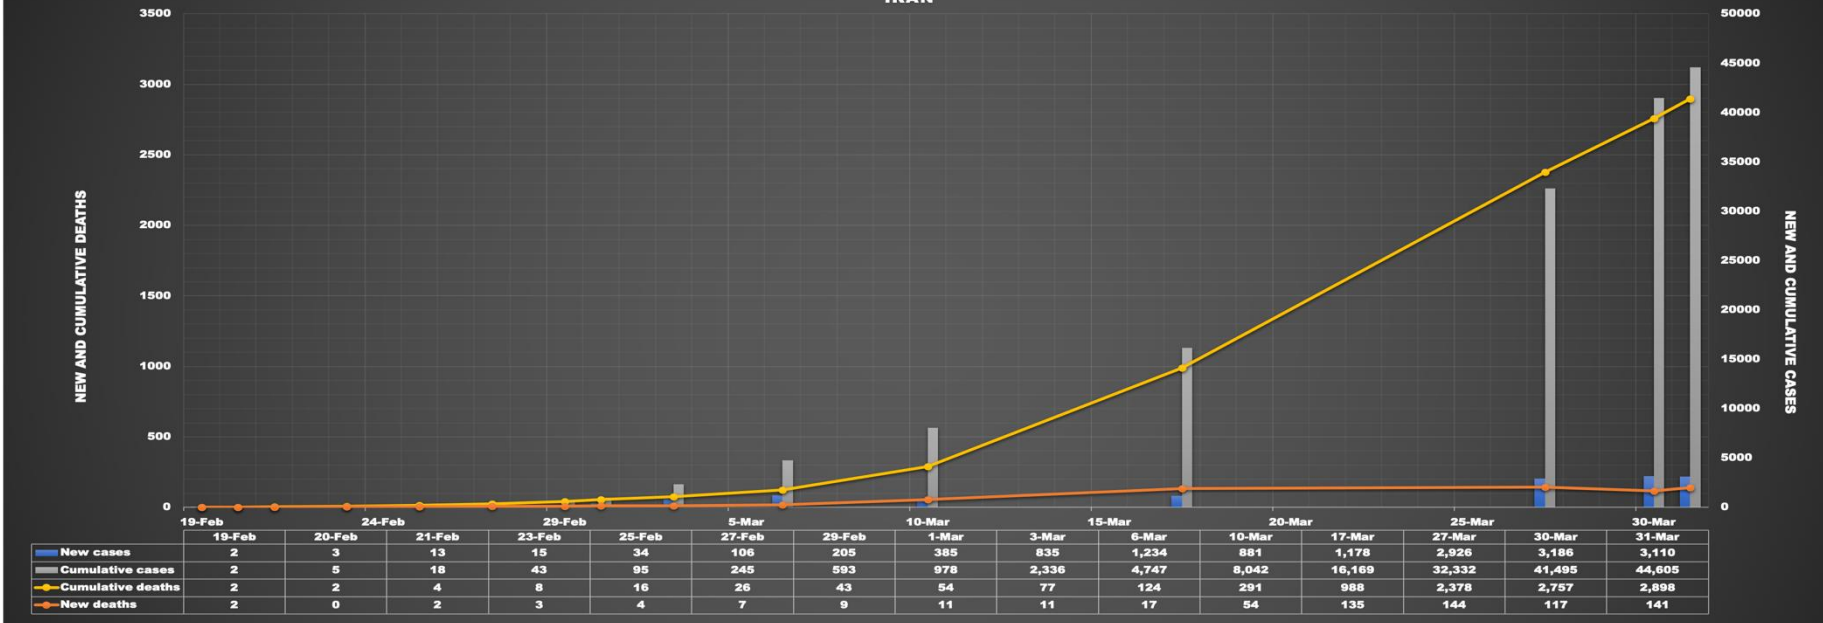

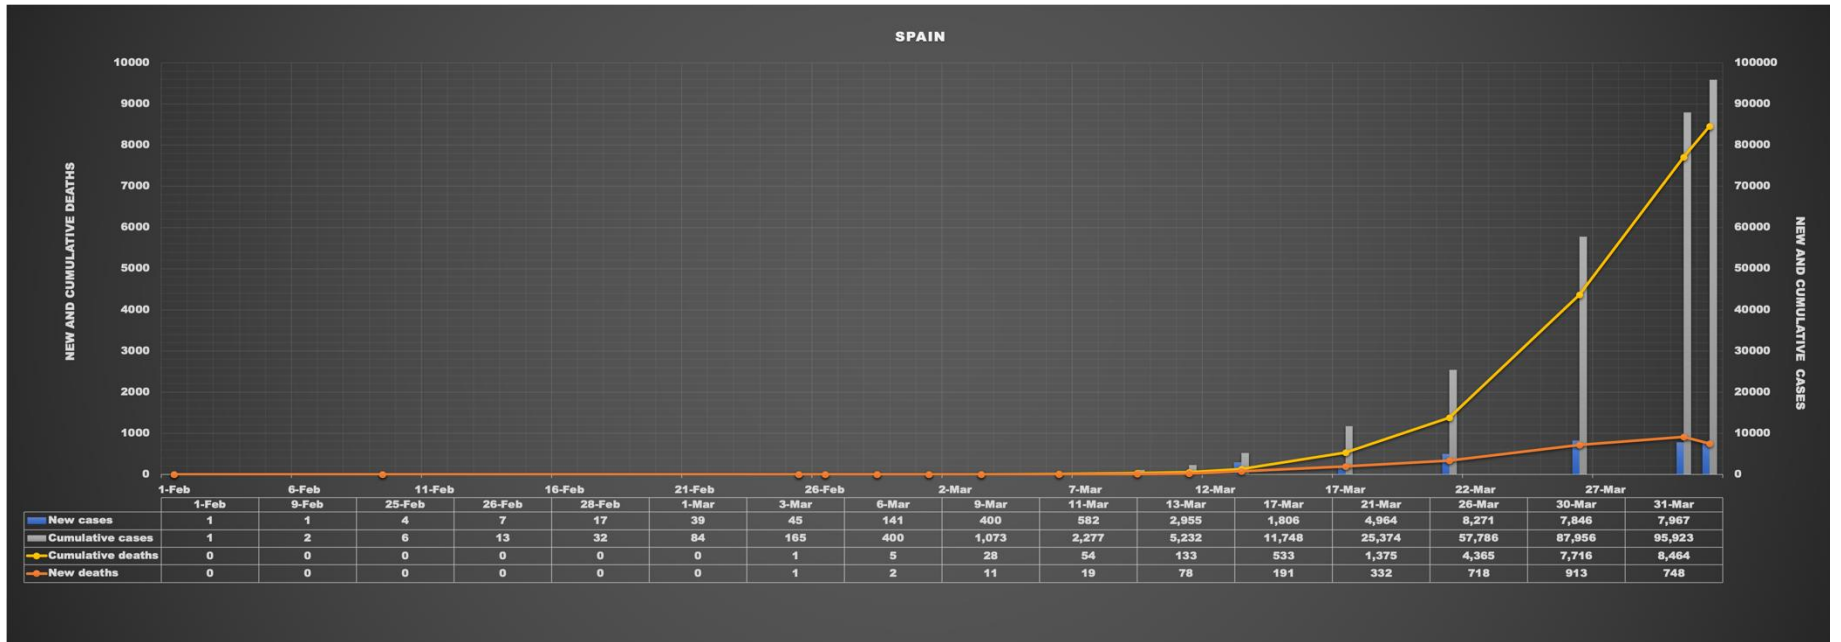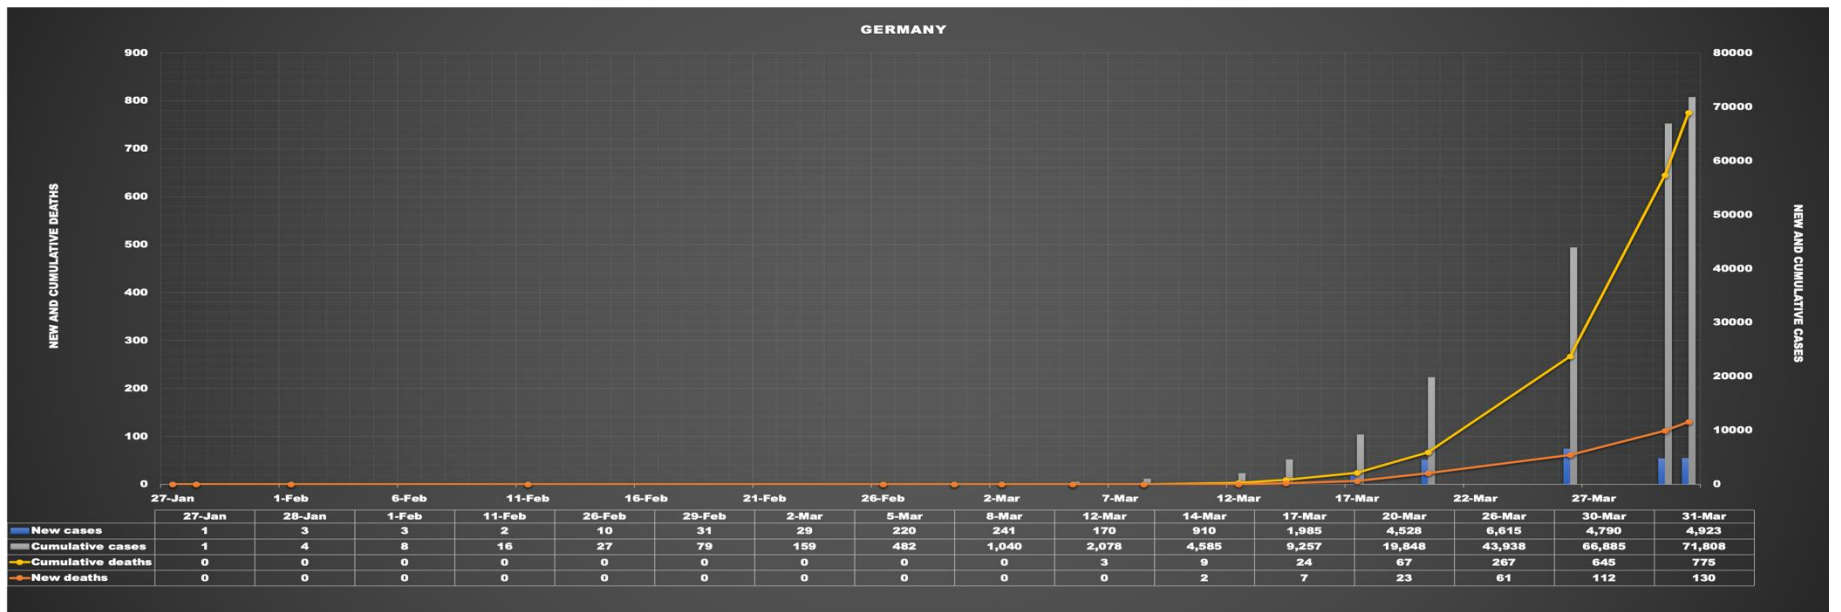



### INDIA

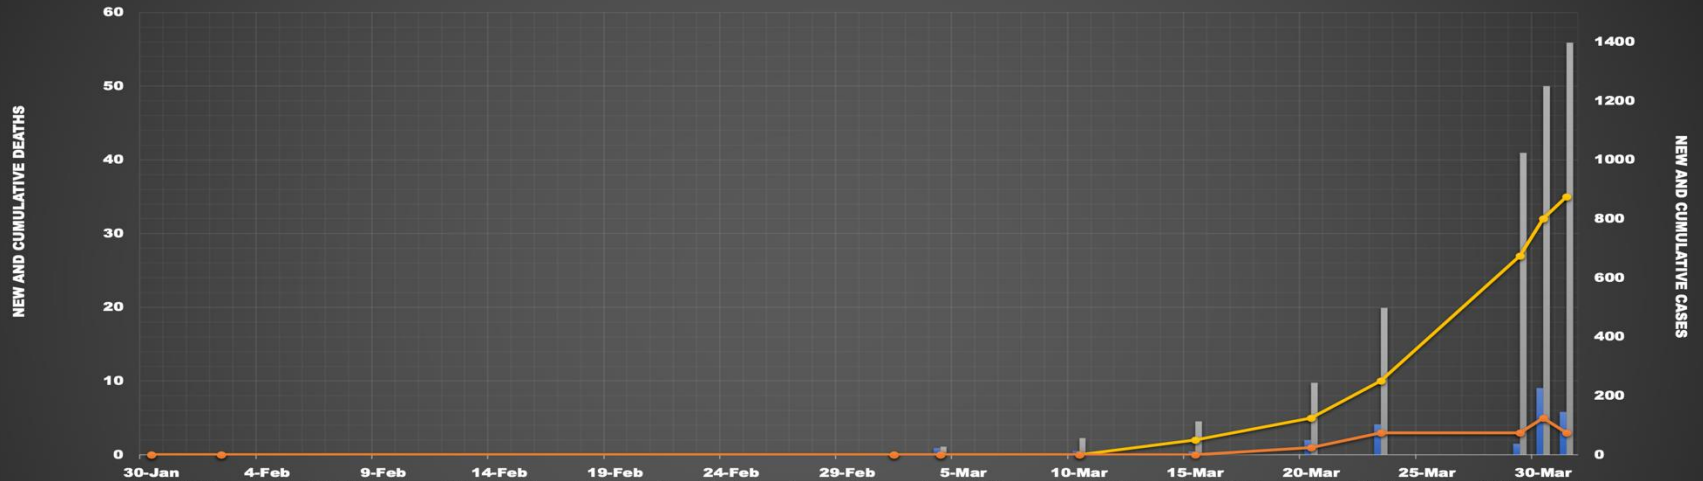

|                   | 30-Jan | 4-Feb | 9-Feb | 14-Feb | 19-Feb | 24-Feb | 29-Feb | 5-Mar | 10-Mar | 15-Mar | 20-Mar | 25-Mar | 30-Mar |
|-------------------|--------|-------|-------|--------|--------|--------|--------|-------|--------|--------|--------|--------|--------|
| New cases         | 1      | 1     | 2     | 23     | 13     | 11     | 50     | 103   | 37     | 227    | 146    |        |        |
| Cumulative cases  | 1      | 2     | 5     | 28     | 56     | 113    | 244    | 499   | 1,024  | 1,251  | 1,397  |        |        |
| Cumulative deaths | 0      | 0     | 0     | 0      | 0      | 0      | 0      | 1     | 3      | 5      | 10     | 27     | 32     |
| New deaths        | 0      | 0     | 0     | 0      | 0      | 0      | 0      | 0     | 0      | 0      | 0      | 0      | 0      |

### SOUTH KOREA

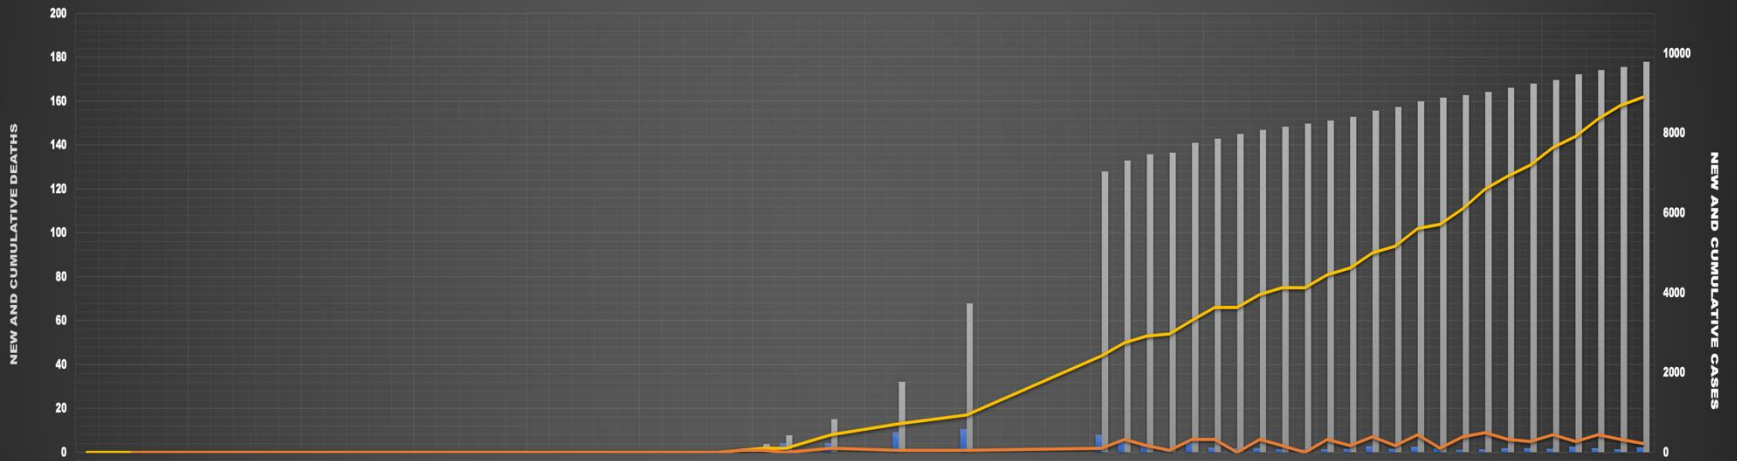

|                   | 22-Jan | 24-Jan | 27-Jan | 31-Jan | 5-Feb | 19-Feb | 20-Feb | 21-Feb | 22-Feb | 24-Feb | 27-Feb | 1-Mar | 7-Mar | 8-Mar | 9-Mar | 10-Mar | 11-Mar | 12-Mar | 13-Mar | 14-Mar | 15-Mar | 16-Mar | 17-Mar | 18-Mar | 19-Mar | 20-Mar | 21-Mar | 22-Mar | 23-Mar | 24-Mar | 25-Mar | 26-Mar | 27-Mar | 28-Mar | 29-Mar | 30-Mar | 31-Mar |
|-------------------|--------|--------|--------|--------|-------|--------|--------|--------|--------|--------|--------|-------|-------|-------|-------|--------|--------|--------|--------|--------|--------|--------|--------|--------|--------|--------|--------|--------|--------|--------|--------|--------|--------|--------|--------|--------|--------|
| New cases         | 1      | 1      | 4      | 7      | 3     | 0      | 73     | 100    | 229    | 231    | 505    | 586   | 448   | 273   | 164   | 35     | 242    | 114    | 110    | 107    | 76     | 74     | 84     | 93     | 152    | 87     | 147    | 98     | 64     | 76     | 100    | 104    | 91     | 146    | 105    | 78     | 125    |
| Cumulative cases  | 1      | 2      | 4      | 11     | 19    | 31     | 104    | 204    | 433    | 833    | 1,766  | 3,736 | 7,041 | 7,314 | 7,478 | 7,513  | 7,755  | 7,869  | 7,979  | 8,086  | 8,162  | 8,236  | 8,320  | 8,413  | 8,565  | 8,652  | 8,799  | 8,897  | 8,961  | 9,037  | 9,137  | 9,241  | 9,332  | 9,478  | 9,583  | 9,661  | 9,786  |
| Cumulative deaths | 0      | 0      | 0      | 0      | 0     | 0      | 1      | 2      | 2      | 8      | 13     | 17    | 44    | 50    | 53    | 54     | 60     | 66     | 66     | 72     | 75     | 75     | 81     | 84     | 91     | 94     | 102    | 104    | 111    | 120    | 126    | 131    | 139    | 144    | 152    | 158    | 162    |
| New deaths        | 0      | 0      | 0      | 0      | 0     | 0      | 1      | 1      | 0      | 2      | 1      | 2     | 6     | 3     | 1     | 6      | 6      | 0      | 6      | 3      | 0      | 6      | 3      | 7      | 3      | 8      | 2      | 7      | 9      | 6      | 5      | 8      | 5      | 8      | 6      | 4      |        |
